# Supplementary material for: High-efficiency photocatalytic activity of type II SnO/Sn3O4 heterostructures via interfacial charge transfer
Source: Royal Society of Chemistry journal article supplement (doi:10.1039/c4ce00884g), 2014-01-01
Supplement: c4ce00884g1.pdf [file c4ce00884g1.pdf]

# High Efficient Photocatalytic Activity of Type-II SnO/Sn<sub>3</sub>O<sub>4</sub> Heterostructures via Interfacial Charge Transfer

Weiwei Xia<sup>\*†a</sup>, Haibo Wang<sup>†a</sup>, Xianghua Zeng<sup>a\*</sup>, Jie Han<sup>b</sup>, Jun Zhu<sup>a</sup>, Min Zhou<sup>a</sup>, Shudong Wu<sup>a</sup>

<sup>a</sup> *College of Physics Science and Technology & Institute of Optoelectronic Technology, Yangzhou University, Yangzhou 225002, P.R. China*

<sup>b</sup> *School of Chemistry and Chemical Engineering, Yangzhou University, Yangzhou 225002, P.R. China* □

## Supporting Information

### Contents:

**S1. XRD patterns and TGA**

**S2. Raman spectra**

**S3. SEM and TEM images**

---

\* Corresponding authors. Email: [wxia@yzu.edu.cn](mailto:wxia@yzu.edu.cn) and [xhzeng@yzu.edu.cn](mailto:xhzeng@yzu.edu.cn)

## S1. XRD patterns and TGA

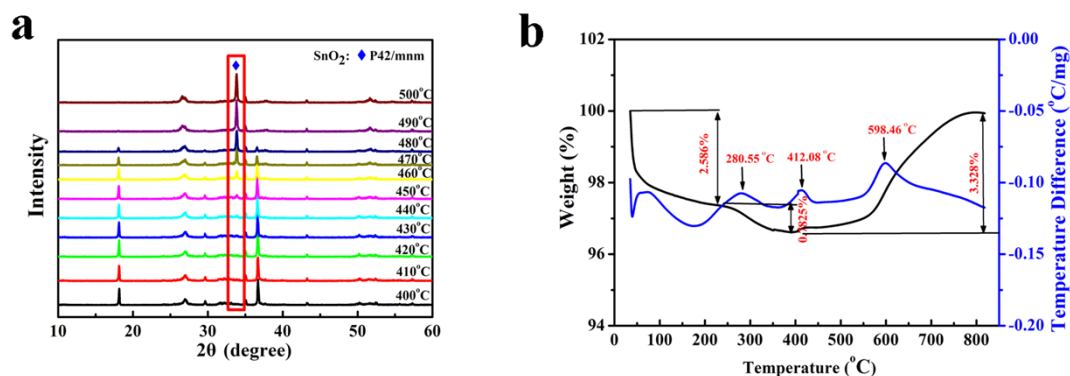

Figure.S1 (a) XRD patterns of tin oxide-base powders characterized at different temperatures (400, 410, 420, 430, 440, 450, 460, 470, 480, 490, 500 °C), respectively. (b) TG and DTG profiles of the thermolysis of tin oxide-base powders.

In order to get insight the overall phase transformation as function of annealing at temperatures from 400 °C to 500 °C, in situ powder XRD measurements and TGA were used to characterize the powder treated at various preset temperatures. The stacked XRD patterns of the as synthesized powder after annealing at different temperatures are depicted in Figure. S1(a). From the sequence, it is clearly evident that the major diffraction peak of SnO<sub>2</sub> ( $2\theta = 39.97^\circ$  (101) plane) monotonically increases with increasing annealing temperature beyond about 460°C. The thermal decomposition process from SnO/Sn<sub>3</sub>O<sub>4</sub> to SnO<sub>2</sub>/Sn<sub>3</sub>O<sub>4</sub> was also studied by performing TGA in flowing air, which was shown in Figure. S1(b). The representative TG and DTG profiles exhibit three distinct regions of weight changes, one showing a loss in the initial weight of the sample followed by a steeper loss with transition onset at ~200 °C. The first weight loss of ~2.59% occurring in the temperature range from RT to 200 °C corresponds to the removal of physically adsorbed water. The second weight loss step observed from 200 to 400 °C is probably due to the degradation of bound hydroxyl (-OH) groups from the surface of synthesized products. The final transition on the thermogram accompanied with the slight gain in weight (~3.33%) with an onset at ~420 °C signifies a phase change occurring in the oxidation process from SnO/Sn<sub>3</sub>O<sub>4</sub> to SnO<sub>2</sub>/Sn<sub>3</sub>O<sub>4</sub>. The increase in sample mass can be associated with addition of oxygen, associated with the complete phase transformation of SnO into SnO<sub>2</sub>. The results of TGA analysis are good for our XRD observations as discussed in the preceding section (Figure. S1(a)).

## S2. Raman spectra

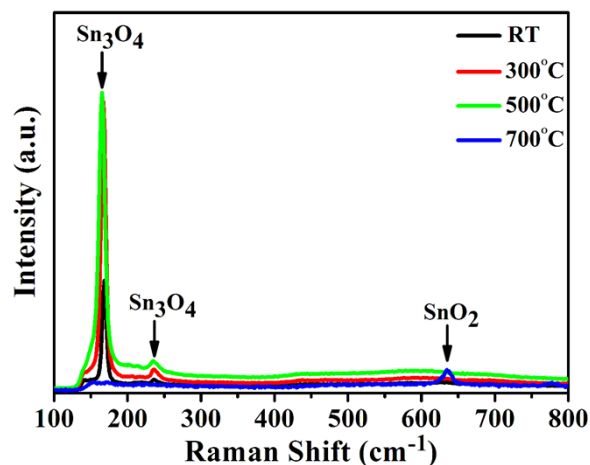

Figure.S2 Raman spectra of tin oxide-base powders characterized at 300, 500, 700 °C, respectively.

Moreover, to confirm the existence of Sn<sub>3</sub>O<sub>4</sub>, Raman spectroscopy was performed to clarify the crystalline compositions and structures of the above-mentioned samples. As shown in Figure. S2, two fundamental Raman peaks are detected at 170 and 238 cm<sup>-1</sup>, corresponding to peaks of phonon modes of Sn<sub>3</sub>O<sub>4</sub>, consistent with the literature.<sup>1-2</sup> With further increase of the annealing temperature to 700°C, a weak band peaking at 633 cm<sup>-1</sup> was detected and can be assigned as A<sub>1g</sub> phonon modes of SnO<sub>2</sub>.<sup>3</sup> The result of Raman analysis is good for our XRD observations as discussed in the preceding section.

## S3. SEM and TEM images

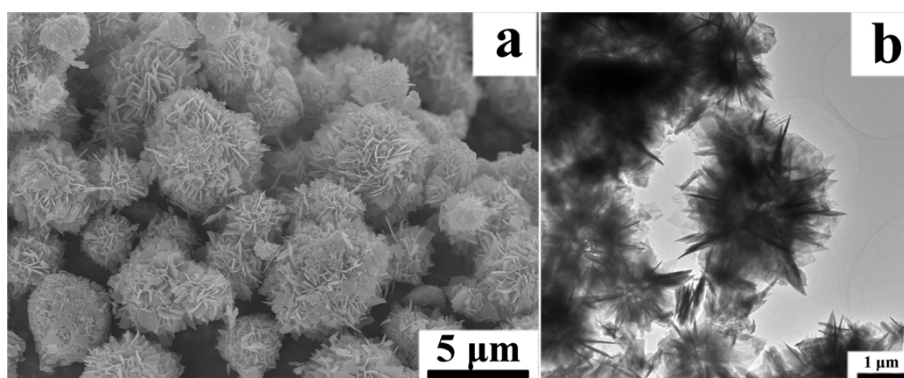

Figure.S3 SEM and TEM images of as-synthesized tin oxide microspheres after five-cycle photocatalytic test.

## Reference

- [1] He, Y. H.; Li, D. Z.; Chen, J.; Shao, Y. Sn<sub>3</sub>O<sub>4</sub>: a novel heterovalent-tin photocatalyst with hierarchical 3D nanostructures under visible light. *RSC Adv.* 2014, 4, 1266–1269.
- [2] Wang, F. P.; Zhou, X. T.; Zhou, J. G.; Sham, T. K. Observation of Single Tin Dioxide Nanoribbons by Confocal Raman Microspectroscopy. *J. Phys. Chem. C.* 2007, 111, 18839–18843.
- [3] Chen, Z. W.; Lai, J. K. L.; Shek, C. H. Insights into microstructural evolution from nanocrystalline SnO<sub>2</sub> thin films prepared by pulsed laser depositio. *Phys. Rev. B.* 2004, 70, 165314-165321.
